# Supplementary material for: Responsive CO2 capture: predictive multi-objective optimisation for managing intermittent flue gas and renewable energy supply
Source: Royal Society of Chemistry journal article supplement (doi:10.1039/d3re00544e), 2023-12-22
Supplement: d3re00544e1.pdf [file d3re00544e1.pdf]

**Responsive CO<sub>2</sub> capture: Predictive multi-objective optimisation for managing intermittent  
flue gas and renewable energy supply**

**(Supplementary Information)**

Oliver J. Fisher<sup>1</sup>, Lei Xing<sup>1\*</sup>, Xingjian Tian<sup>2</sup>, Xin Yee Tai<sup>1</sup>, Jin Xuan<sup>1\*</sup>

<sup>1</sup>School of Chemistry and Chemical Engineering, Faculty of Engineering and Physical Sciences,  
University of Surrey, UK

<sup>2</sup>School of Chemistry and Chemical Engineering, Jiangsu University, Zhenjiang 212013, China

Corresponding authors: [l.xing@surrey.ac.uk](mailto:l.xing@surrey.ac.uk); [j.xuan@lboro.ac.uk](mailto:j.xuan@lboro.ac.uk)

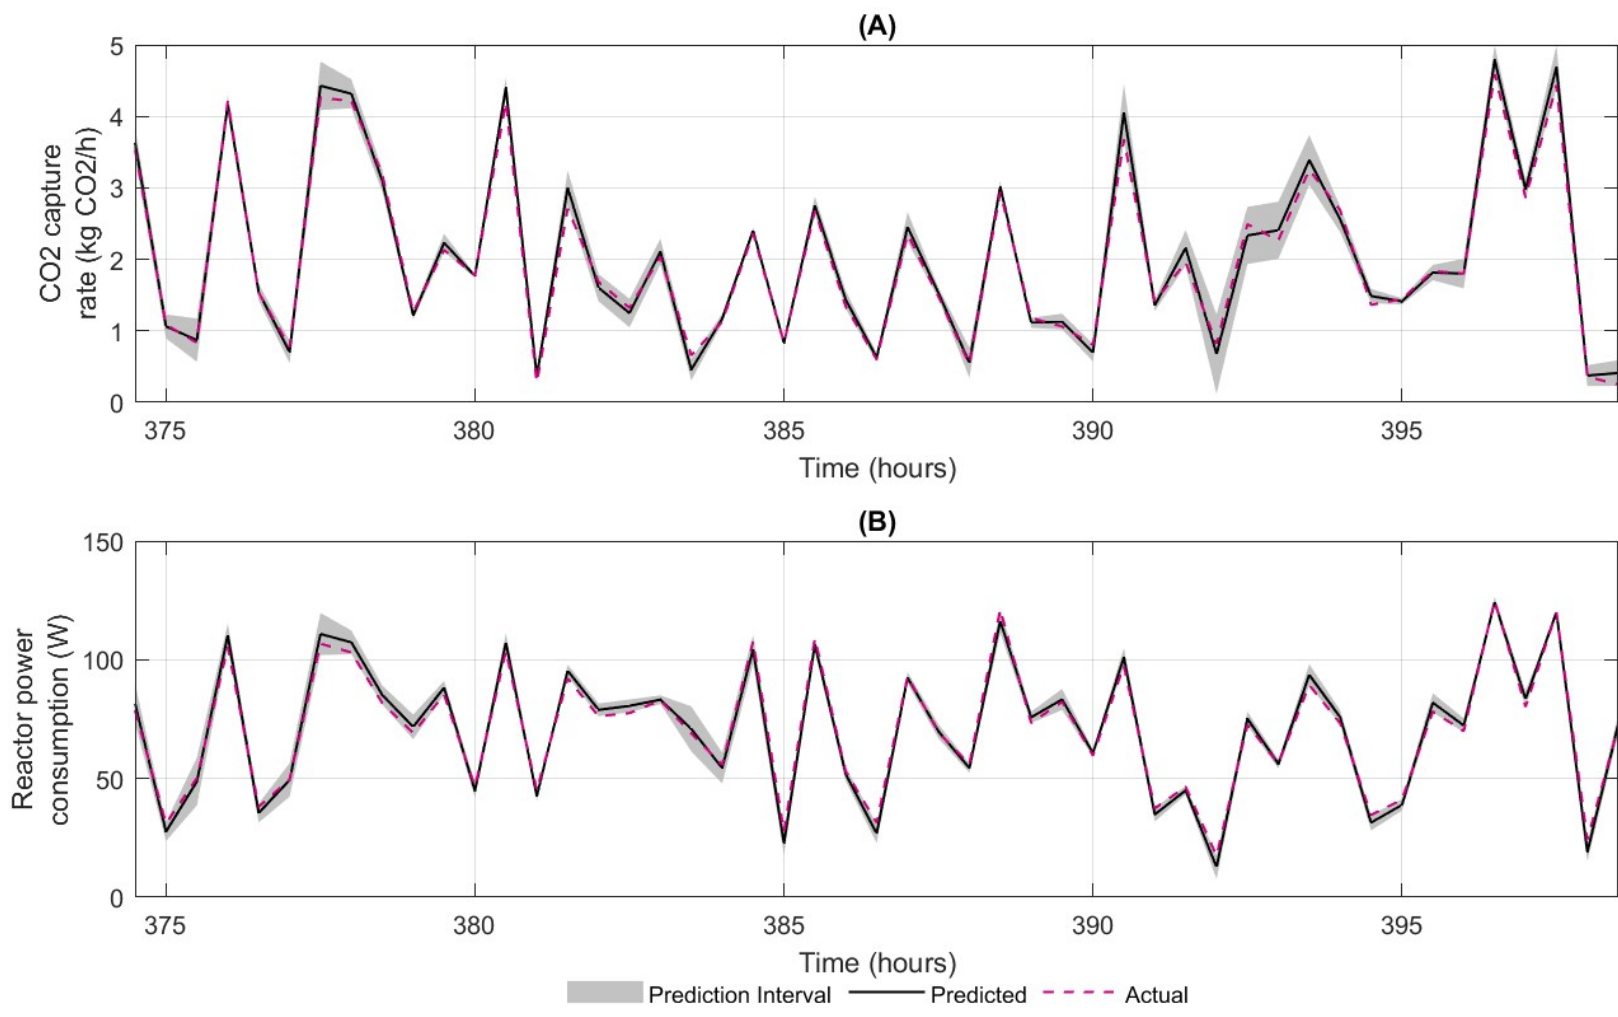

**Figure SI.1** Comparison of CO<sub>2</sub> capture rate (A) and reactor power consumption (B) predictions against actual values, including prediction intervals determined using conformal prediction, between 347.5 and 398.5 reactor operation hours using unseen data.

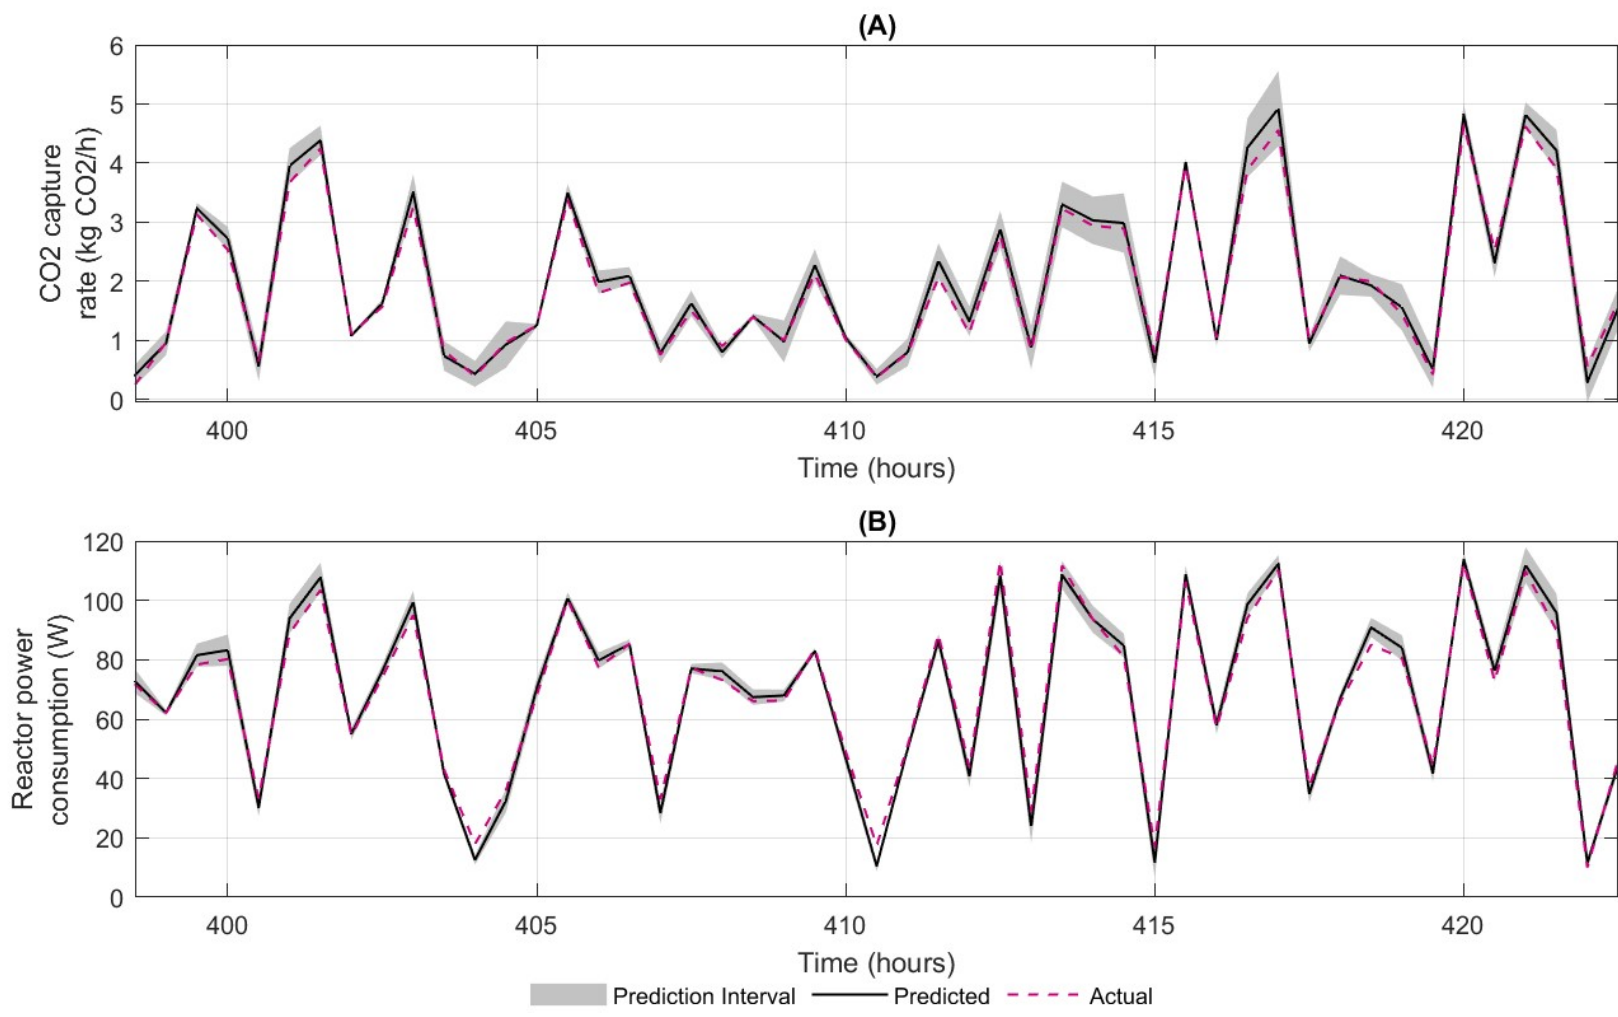

**Figure SI.2** Comparison of CO<sub>2</sub> capture rate (A) and reactor power consumption (B) predictions against actual values, including prediction intervals determined using conformal prediction, between 398.5 and 422.5 reactor operation hours using unseen data.

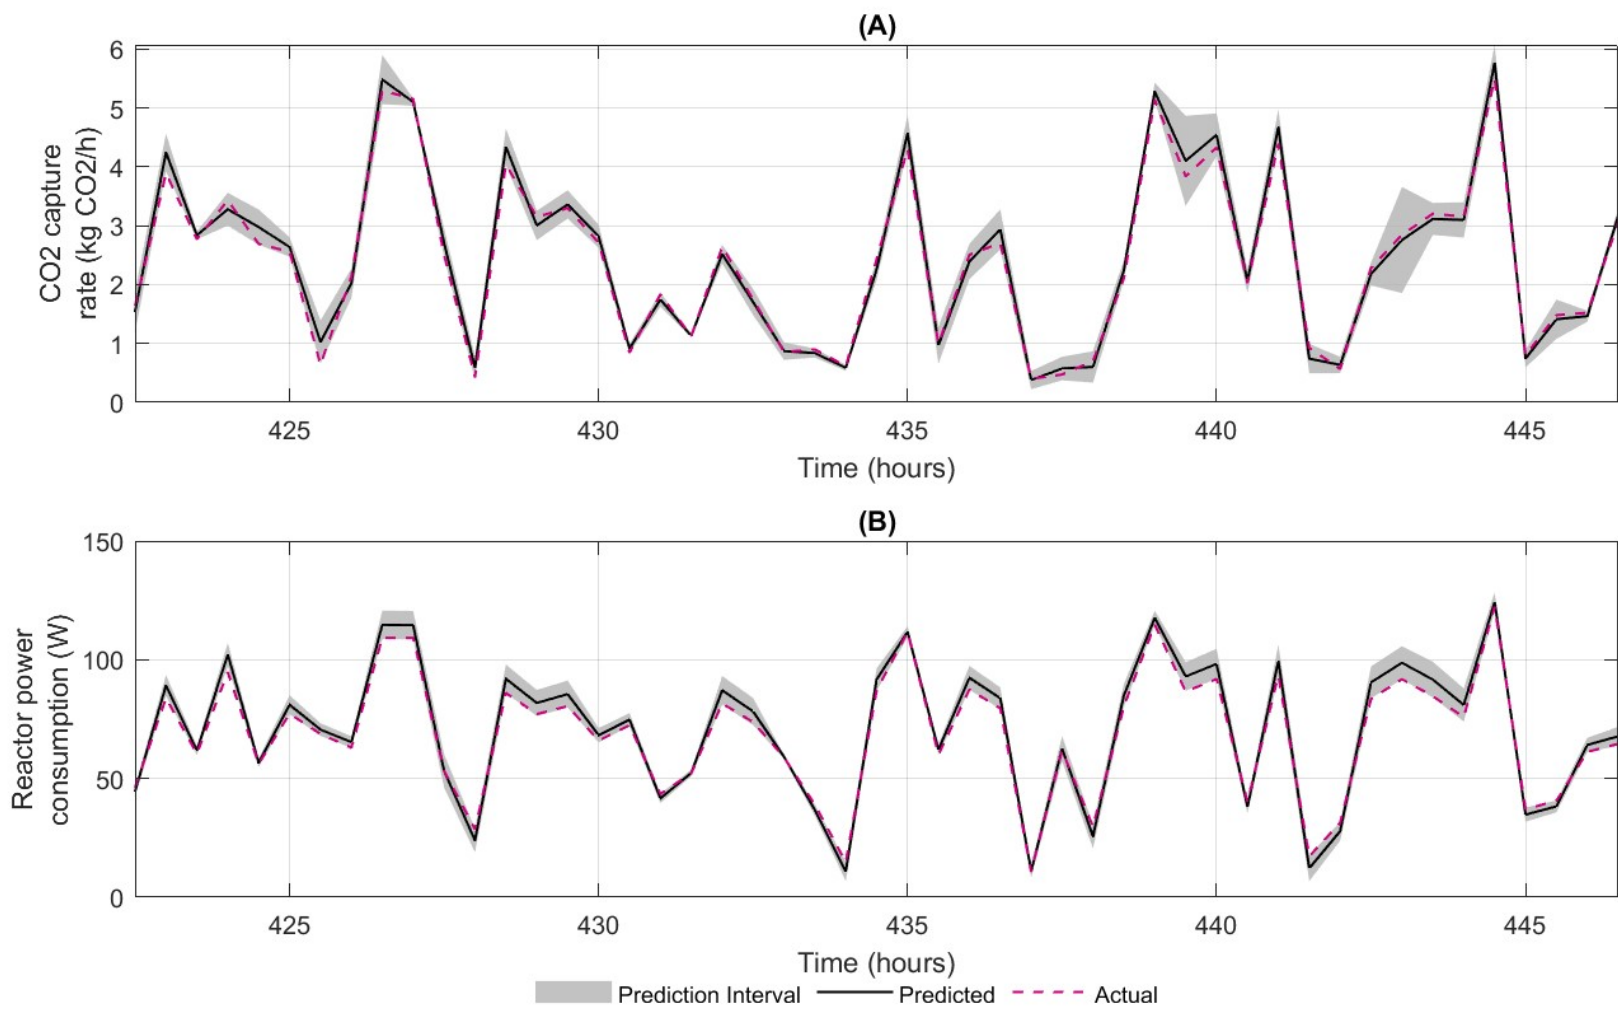

**Figure SI.3** Comparison of CO<sub>2</sub> capture rate (A) and reactor power consumption (B) predictions against actual values, including prediction intervals determined using conformal prediction, between 422.5 and 446.5 reactor operation hours using unseen data.

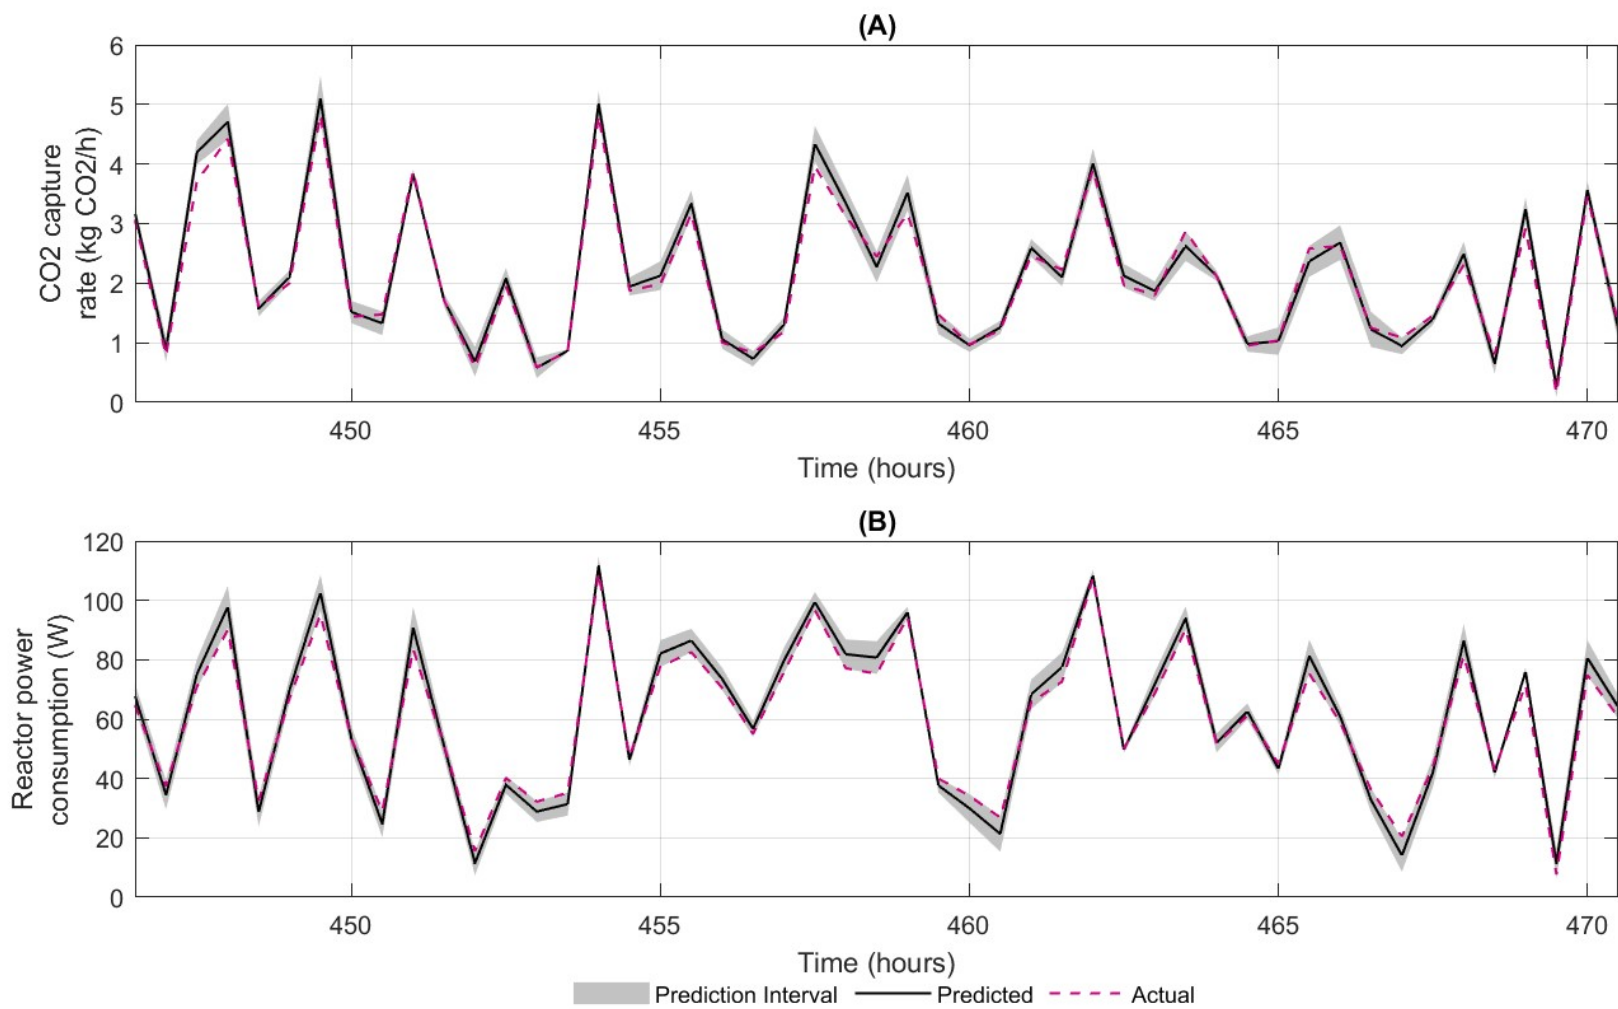

**Figure SI.4** Comparison of CO<sub>2</sub> capture rate (A) and reactor power consumption (B) predictions against actual values, including prediction intervals determined using conformal prediction, between 446.5 and 470.5 reactor operation hours using unseen data.
